# Supplementary material for: High-resolution 3D whole-heart bright- and black-blood imaging with co-registered T2 mapping at 0.55 T
Source: Frontiers journal article supplement (doi:10.3389/fcvm.2025.1572318), 2025-07-03
Supplement: Data_Sheet_1.pdf [file Data_Sheet_1.pdf]

# Supplementary Material

## 1 SUPPLEMENTARY DATA

## 2 SUPPLEMENTARY TABLES AND FIGURES

### 2.1 Figures

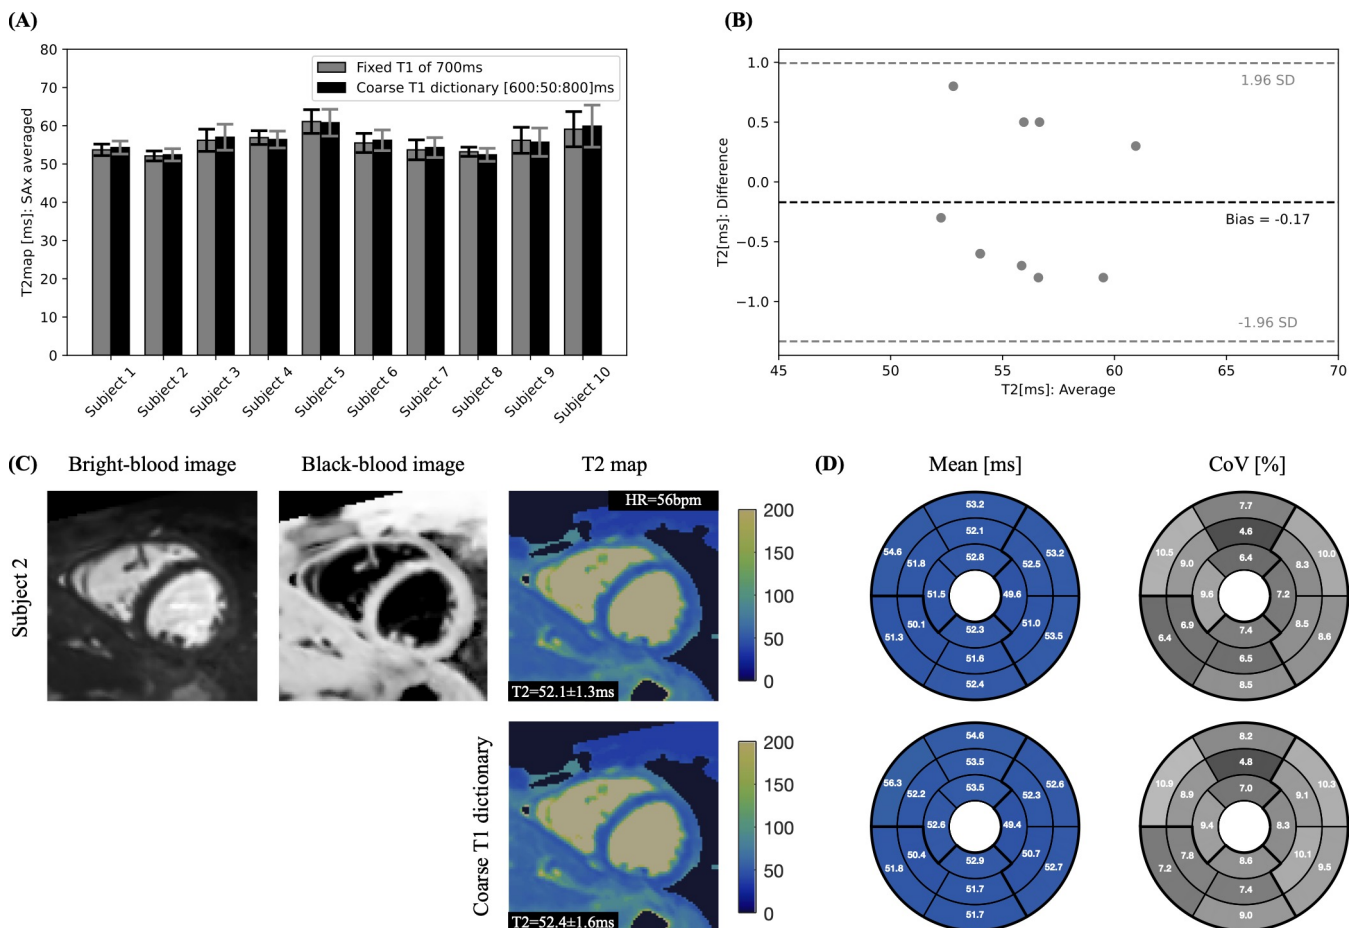

**Figure S1.** Comparison of averaged SAX  $T_2$  values generated with fixed and coarse dictionary  $T_1$  using bar chart (A) and Bland-Altman plot (B) across all subjects. C: Bright- and black -blood images with co-registered  $T_2$  maps shown for a healthy subject using both methods without any visual difference. D: Bull's-eye plots for mean  $T_2$  values and CoVs.
